# Supplementary material for: The effects of oral clefts on hospital use throughout the lifespan
Source: BMC Health Serv Res. 2012 Mar 9;12:58. doi: 10.1186/1472-6963-12-58 (PMC3350419; doi:10.1186/1472-6963-12-58)
Supplement: Additional file 2 — Table S2. Detailed Logistic and Poisson Regression Results for Age Group 10-19 years. [file 1472-6963-12-58-S2.DOC]

Table S2: Detailed Logistic and Poisson Regression Results for Age Group 10-19 years

|  | Logistic regression | | | | Poisson regression | | | |
| --- | --- | --- | --- | --- | --- | --- | --- | --- |
|  | Full Model | | Excluding Parental SES Characteristics | | Full Model | | Excluding Parental SES Characteristics | |
|  | *Any cleft model* | *Cleft types model* | *Any cleft model* | *Cleft types model* | *Any cleft model* | *Cleft types model* | *Any cleft model* | *Cleft types model* |
| Cleft Status | 1.18**** |  | 1.202**** |  | 0.21**** |  | 0.208**** |  |
|  | (0.02) |  | (0.022) |  | (0.02) |  | (0.024) |  |
| Cleft lip |  | 0.61**** |  | 0.627**** |  | 0.06 |  | 0.055 |
|  |  | (0.04) |  | (0.043) |  | (0.04) |  | (0.043) |
| Cleft lip with palate |  | 1.79**** |  | 1.802**** |  | 0.28**** |  | 0.276**** |
|  |  | (0.03) |  | (0.025) |  | (0.03) |  | (0.026) |
| Cleft palate |  | 0.74**** |  | 0.771**** |  | 0.13** |  | 0.137** |
|  |  | (0.05) |  | (0.046) |  | (0.05) |  | (0.055) |
| Male | -0.09**** | -0.10**** | -0.093**** | -0.106**** | -0.03 | -0.03 | -0.023 | -0.026 |
|  | (0.01) | (0.01) | (0.012) | (0.012) | (0.03) | (0.03) | (0.026) | (0.026) |
| Age (years) | 0.07**** | 0.08**** | 0.064**** | 0.064**** | 0.01*** | 0.01*** | 0.014**** | 0.014**** |
|  | (0.002) | (0.002) | (0.002) | (0.002) | (0.005) | (0.005) | (0.004) | (0.004) |
| Exposure time (days) | -0.002**** | -0.002**** | -0.002**** | -0.002**** | -0.003**** | -0.003**** | -0.003**** | -0.003**** |
| (0.0004) | (0.0004) | (0.0004) | (0.0004) | (0.0006) | (0.0006) | (0.001) | (0.001) |
| Maternal age (years) | -0.01**** | -0.01**** |  |  | -0.001 | -0.001 |  |  |
| (0.002) | (0.002) |  |  | (0.004) | (0.004) |  |  |
| Paternal age (years) | -0.003** | -0.003** |  |  | 0.0008 | 0.0008 |  |  |
| (0.002) | (0.002) |  |  | (0.003) | (0.003) |  |  |
| Maternal upper and post-secondary | -0.10**** | -0.09**** |  |  | -0.004 | -0.004 |  |  |
| (0.01) | (0.01) |  |  | (0.03) | (0.03) |  |  |
| Maternal tertiary | -0.16**** | -0.16**** |  |  | 0.07 | 0.07 |  |  |
|  | (0.02) | (0.02) |  |  | (0.04) | (0.04) |  |  |
| Paternal upper and post-secondary | -0.04*** | -0.04*** |  |  | -0.02 | -0.02 |  |  |
| (0.01) | (0.01) |  |  | (0.03) | (0.03) |  |  |
| Paternal tertiary | -0.09**** | -0.09**** |  |  | -0.02 | -0.02 |  |  |
|  | (0.02) | (0.02) |  |  | (0.04) | (0.04) |  |  |
| Maternal income quintile  20-40% | 0.01 | 0.01 |  |  | -0.06* | -0.06* |  |  |
| (0.02) | (0.02) |  |  | (0.04) | (0.04) |  |  |
| Maternal income quintile  40-60% | 0.01 | 0.01 |  |  | -0.07* | -0.07* |  |  |
| (0.02) | (0.02) |  |  | (0.04) | (0.04) |  |  |
| Maternal income quintile  60-80% | 0.03 | 0.03 |  |  | -0.10** | -0.10** |  |  |
| (0.02) | (0.02) |  |  | (0.04) | (0.04) |  |  |
| Maternal income quintile  80-100% | 0.03 | 0.04 |  |  | -0.15**** | -0.15**** |  |  |
| (0.02) | (0.02) |  |  | (0.04) | (0.04) |  |  |
| Paternal income quintile  20-40% | -0.08**** | -0.08**** |  |  | 0.002 | 0.002 |  |  |
| (0.02) | (0.02) |  |  | (0.03) | (0.03) |  |  |
| Paternal income quintile  40-60% | -0.10**** | -0.10**** |  |  | -0.02 | -0.02 |  |  |
| (0.02) | (0.02) |  |  | (0.04) | (0.04) |  |  |
| Paternal income quintile  60-80% | -0.10**** | -0.10**** |  |  | -0.05 | -0.05 |  |  |
| (0.02) | (0.02) |  |  | (0.04) | (0.04) |  |  |
| Paternal income quintile  80-100% | -0.12**** | -0.12**** |  |  | -0.05 | -0.05 |  |  |
| (0.02) | (0.02) |  |  | (0.04) | (0.04) |  |  |
| Maternal Employed | 0.02 | 0.02 |  |  | 0.08** | 0.08** |  |  |
| (0.03) | (0.03) |  |  | (0.04) | (0.04) |  |  |
| Maternal Unemployed/other | 0.18**** | 0.18**** |  |  | 0.11** | 0.11** |  |  |
| (0.03) | (0.03) |  |  | (0.04) | (0.04) |  |  |
| Paternal Employed | 0.05*** | 0.05*** |  |  | -0.03 | -0.03 |  |  |
|  | (0.02) | (0.02) |  |  | (0.03) | (0.03) |  |  |
| Paternal Unemployed/other | 0.13**** | 0.14**** |  |  | -0.02 | -0.02 |  |  |
| (0.03) | (0.03) |  |  | (0.05) | (0.05) |  |  |
| Cohabiting | 0.11**** | 0.12**** |  |  | -0.01 | -0.01 |  |  |
|  | (0.02) | (0.02) |  |  | (0.05) | (0.05) |  |  |
| Single | 0.15**** | 0.15**** |  |  | -0.03 | -0.03 |  |  |
|  | (0.02) | (0.02) |  |  | (0.03) | (0.03) |  |  |
| 500-999 Inh/km2 | 0.01 | 0.02 |  |  | 0.01 | 0.01 |  |  |
|  | (0.04) | (0.04) |  |  | (0.09) | (0.09) |  |  |
| 200-499 Inh/km2 | 0.05 | 0.05 |  |  | -0.05 | -0.05 |  |  |
|  | (0.04) | (0.04) |  |  | (0.10) | (0.10) |  |  |
| 100-199 Inh/km2 | 0.04 | 0.04 |  |  | 0.04 | 0.05 |  |  |
|  | (0.05) | (0.05) |  |  | (0.10) | (0.10) |  |  |
| 50-99 Inh/km2 | 0.02 | 0.02 |  |  | -0.002 | 0.00007 |  |  |
|  | (0.04) | (0.04) |  |  | (0.10) | (0.10) |  |  |
| <50 Inh/km2 | 0.02 | 0.02 |  |  | -0.07 | -0.07 |  |  |
|  | (0.05) | (0.05) |  |  | (0.10) | (0.10) |  |  |
| Constant | -2.56**** | -2.53**** | -3.068**** | -3.063**** | 2.71**** | 2.72**** | 2.624**** | 2.634**** |
|  | (0.16) | (0.16) | (0.156) | (0.157) | (0.25) | (0.25) | (0.217) | (0.217) |
| Observations | 710815 | 710815 | 710815 | 710815 | 42787 | 42787 | 42787 | 42787 |

Note: The Table reports the regression coefficients and their standard errors in parentheses; *=p<1; **=p<0.05; ***=p<0.01; ****=p<0.001; results for county and year binary indicators are omitted for brevity
