# Supplementary figures and images for: The effects of oral clefts on hospital use throughout the lifespan
Source: Springer Nature journal article supplement (doi:10.1186/1472-6963-12-58), 2012-03-09

% changes in hospitalizations  
with oral cleft types

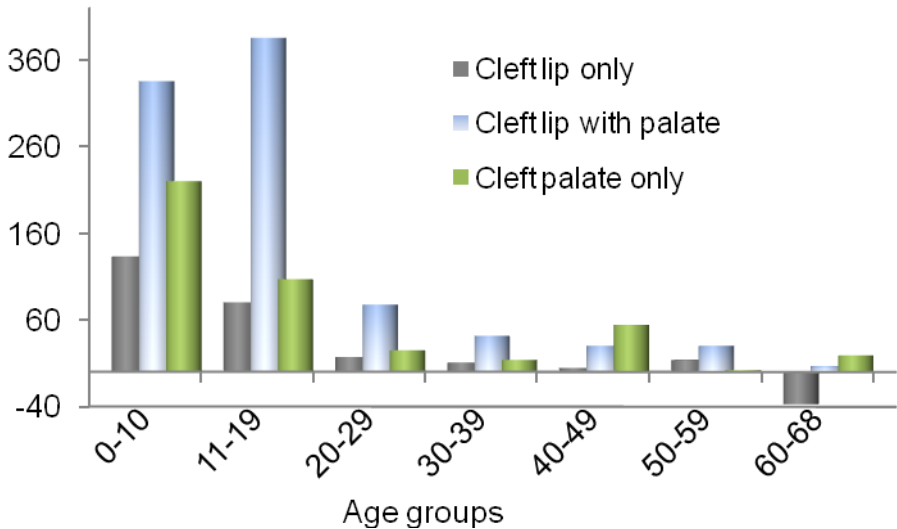

Supplement: 12913_2011_1983_MOESM10_ESM.pdf [file 12913_2011_1983_MOESM10_ESM.pdf]

Hospital Use

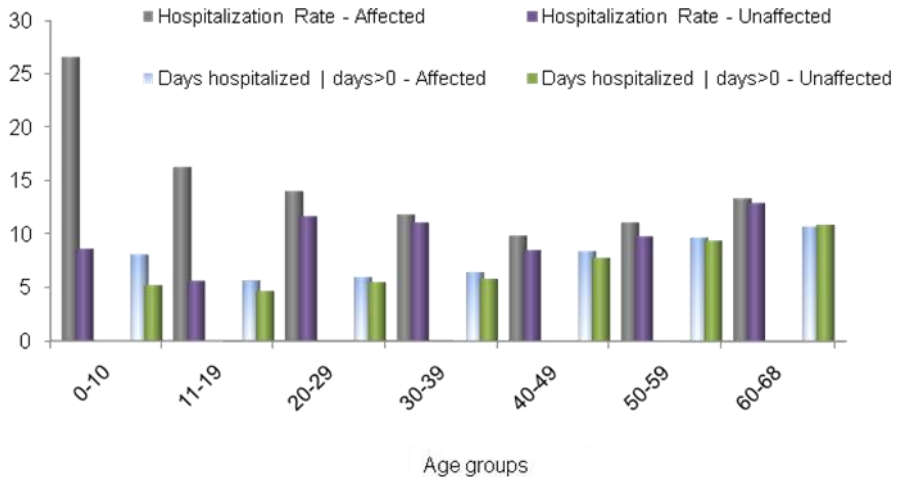

Supplement: 12913_2011_1983_MOESM8_ESM.pdf [file 12913_2011_1983_MOESM8_ESM.pdf]

% changes in hospitalizations  
with oral clefts

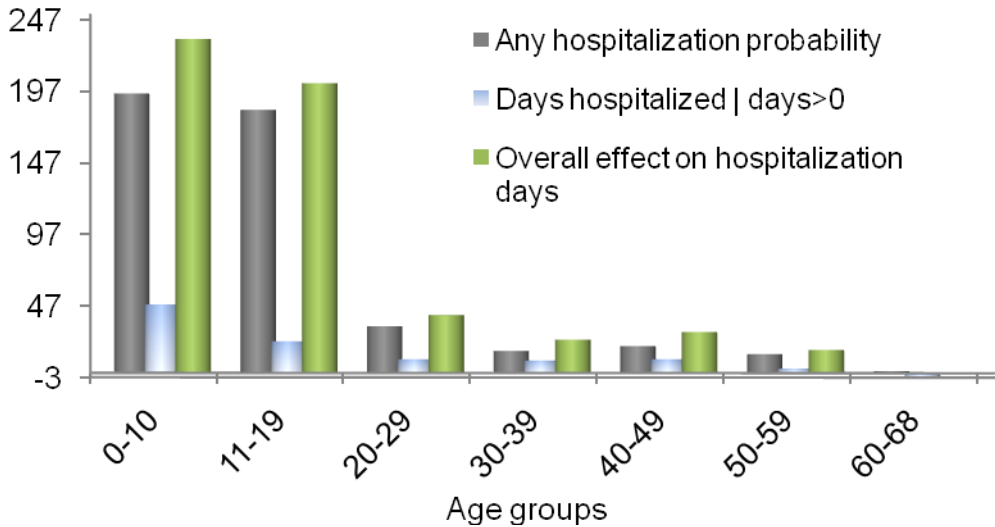

Supplement: 12913_2011_1983_MOESM9_ESM.pdf [file 12913_2011_1983_MOESM9_ESM.pdf]
